# Supplementary material
Source: publisher figshare collection journal article supplement (https://karger.figshare.com/articles/dataset/_/5123017)
Supplement: Supplementary file 1 [file 1]

Archive with 3 entries (3 files):
- 000334234_sm_Figure.pdf
- 000334234_sm_Figure.pptx
- 000334234_sm_Legend.doc
