# Supplementary material
Source: publisher figshare collection journal article supplement (https://karger.figshare.com/articles/dataset/_/5123017)
Supplement: Supplementary file 1 [file 1 › 000334234_sm_Figure.pdf]

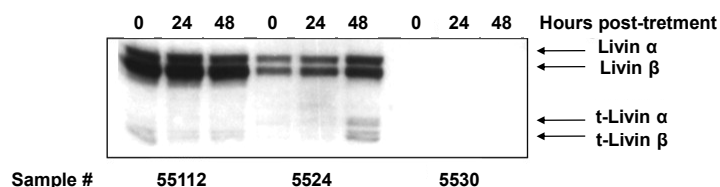

**Figure 1-Sup**

Fig. 1-sup

Cleavage of Livin in primary melanoma cultures in response to etoposide:

To demonstrate the relevance of Livin cleavage in primary melanoma, three samples: 55112 and 5524 expressing high and moderate levels of the two splicing variants of Livin ( $\alpha$  and  $\beta$ ), respectively, and 5530 with no detectable Livin were treated with 15  $\mu\text{g/ml}$  etoposide for 24 and 48 hours. Samples were lysed, normalized for total protein, and analyzed by Western blot. Accordingly, sample 55112, which was completely resistant to etoposide, showed no cleavage of Livin, sample 5524 showed moderate cleavage, appearing only 48 h after treatment, and no Livin was detected in the melanoma sample 5530.
